# Supplementary material for: Genome-wide CRISPR Screen to Identify Genes that Suppress Transformation in the Presence of Endogenous KrasG12D
Source: PubMed Central journal article supplement (PMC6868134; doi:10.1038/s41598-019-53572-w), 2019-11-20
Supplement: 41598_2019_53572_MOESM1_ESM.pdf [file 41598_2019_53572_MOESM1_ESM.pdf]

## Title

Genome-wide CRISPR Screen to Identify Genes that Suppress Transformation in the Presence of Endogenous *Kras*<sup>G12D</sup>

## Authors

Jianguo Huang<sup>a</sup>, Mark Chen<sup>b,c</sup>, Eric S. Xu<sup>a</sup>, Lixia Luo<sup>a</sup>, Yan Ma<sup>a</sup>, Wesley Huang<sup>a</sup>, Warren Floyd<sup>b,c</sup>, Tyler Klann<sup>d,e</sup>, So Young Kim<sup>f</sup>, Charles A. Gersbach<sup>d,e</sup>, Diana M Cardona<sup>g</sup>, David G. Kirsch<sup>a,b</sup>

<sup>a</sup> Department of Radiation Oncology, Duke University Medical Center, Durham, North Carolina, 27708

<sup>b</sup> Department of Pharmacology and Cancer Biology, Duke University Medical Center, Durham, North Carolina, 27708

<sup>c</sup> Medical Scientist Training Program, Duke University Medical Center, Durham, North Carolina, 27708

<sup>d</sup> Department of Biomedical Engineering, Duke University, Durham, North Carolina, 27708

<sup>e</sup> Duke Center for Genomic and Computational Biology, Duke University, Durham, North Carolina, 27708

<sup>f</sup> Department of Molecular Genetics and Microbiology, Duke University, Durham, North Carolina, 27708

<sup>g</sup> Department of Pathology, Duke University, Durham, North Carolina, 27708

## Corresponding author

David G. Kirsch

Duke University Medical Center, DUMC Box 91006, Durham, North Carolina 27708

Tel: 919-68-8605, E-mail: [david.kirsch@duke.edu](mailto:david.kirsch@duke.edu)

## Supplementary Information

**Supplementary Figure. S1:** Deep sequencing of each sgRNA represented in the customized library.

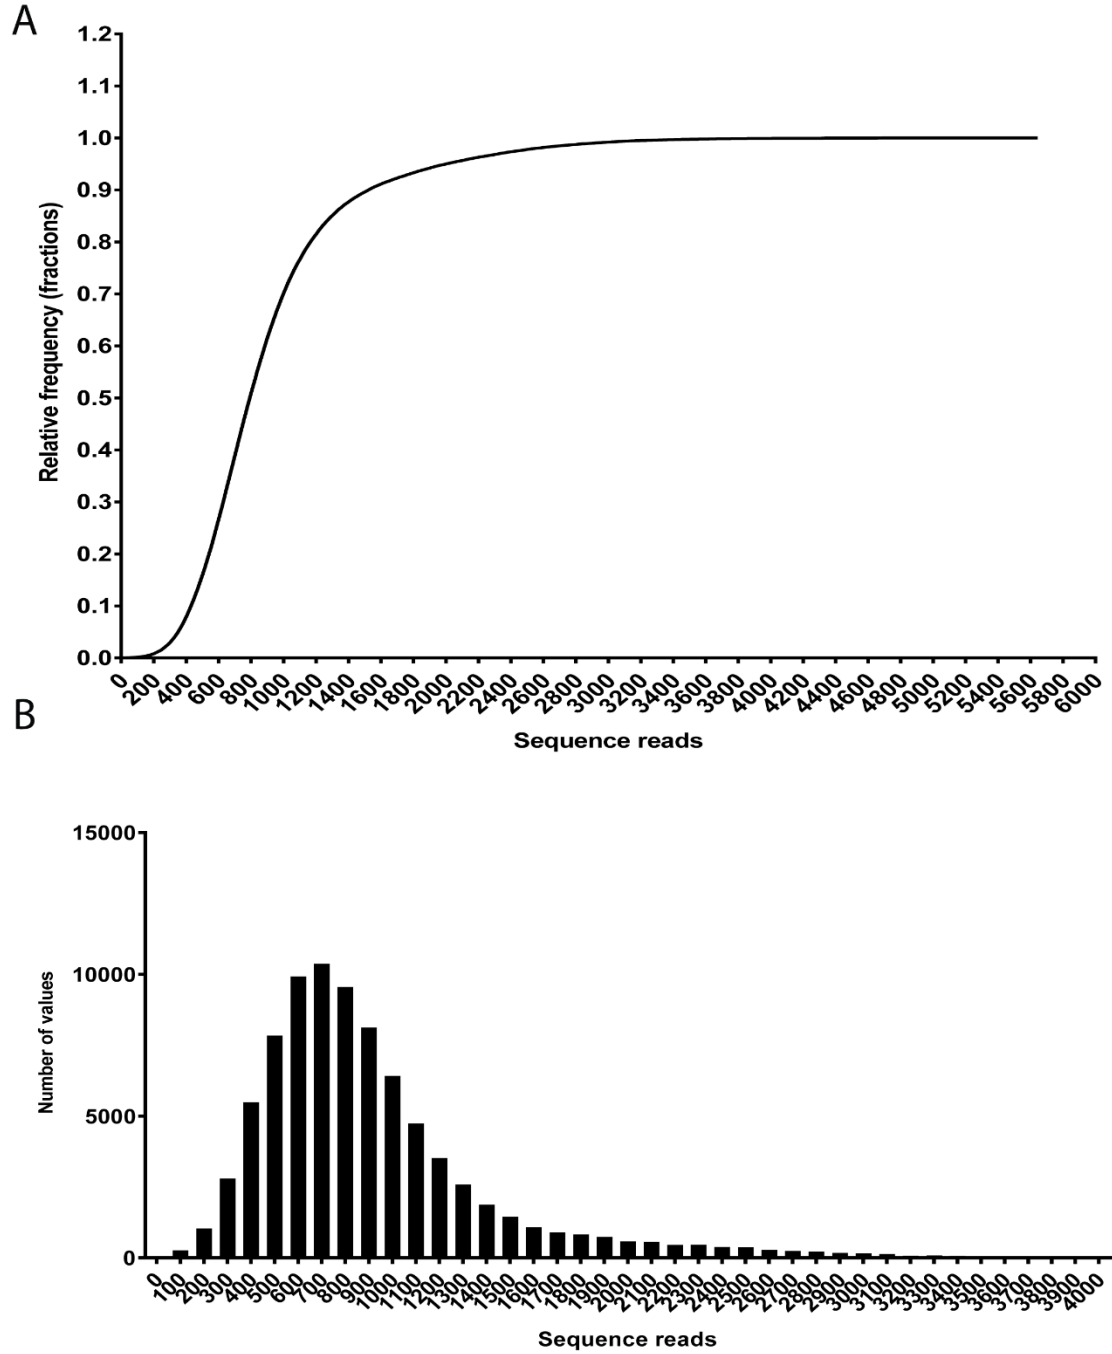

**Supplementary Figure S2:** (A) Surveyor assay on Tumor #1844. (B) Surveyor assay on Tumor #1846.

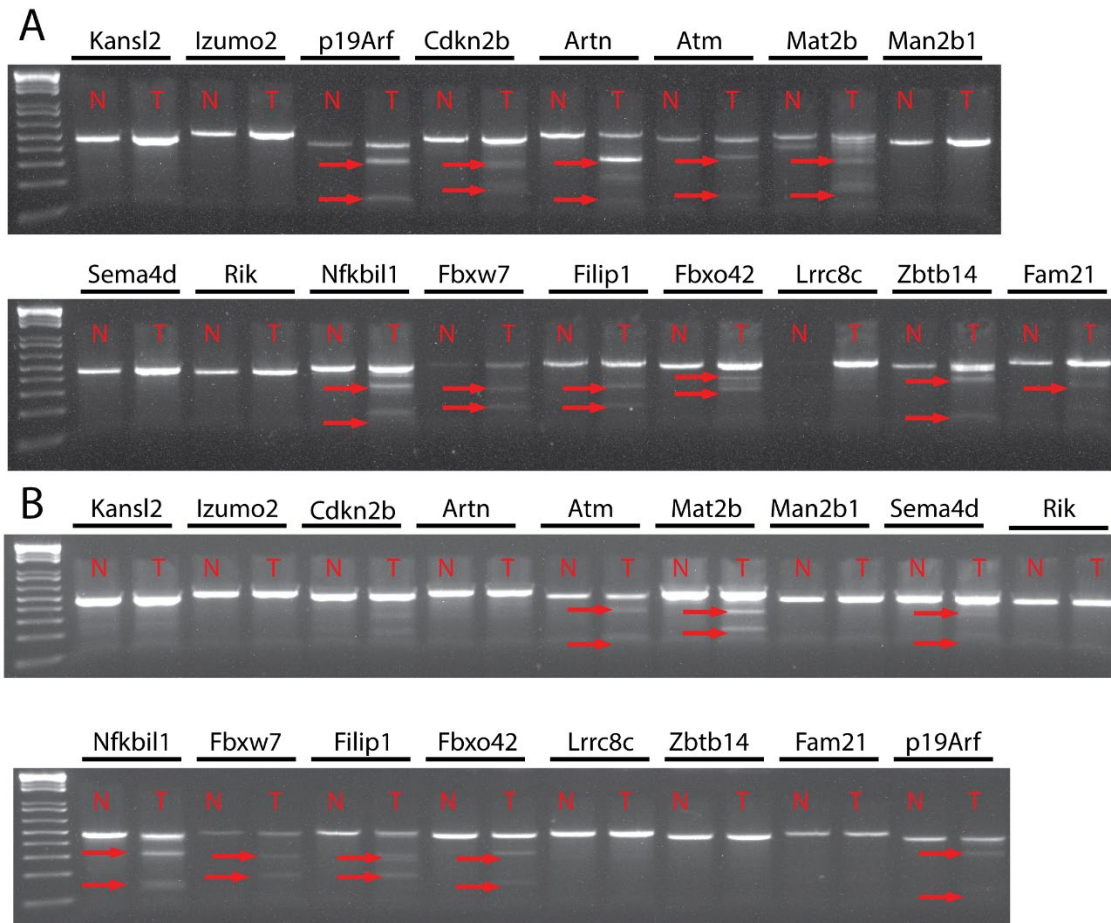

**Supplementary Figure S3.** (A) Surveyor assay on MEF-LoxP-KC infected with lentivirus that expresses a second sgRNA targeting *Fbxw7*, *Kansl2*, or *Izumo2*. The gel image of the marker and the gel image of the surveyor assay on lenti-Neg and lenti-*Fbxw7* sg-2 were cropped from the same gel which is shown in **Supplementary Figure S5**. (B) MEF-LoxP-KC infected with lentivirus that expresses a second sgRNA targeting *Fbxw7*, *Kansl2*, or *Izumo2* failed to form colonies in soft agar.

A

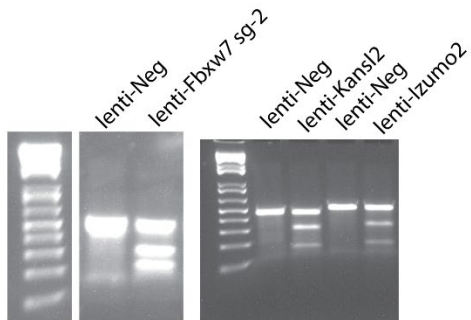

B

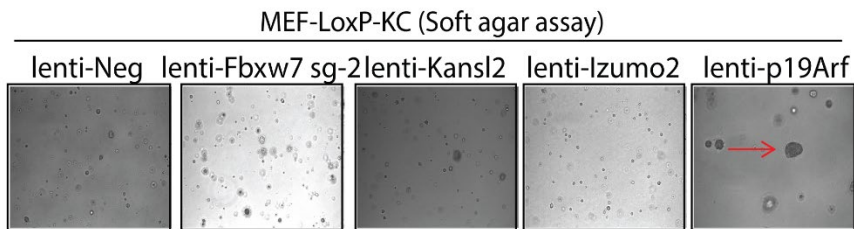

**Supplementary Figure S4.** Eight of the primary tumors generated in K-LoxP-C mice via IVE that delivered Cre recombinase and *Trp53* sgRNA, or *p19<sup>Arf</sup>* sgRNA or mixed pool of sgRNAs targeting 20 candidates including *p19<sup>Arf</sup>* were subject to histopathological analysis with haematoxylin and eosin staining. Scale bars, 200  $\mu$ m.

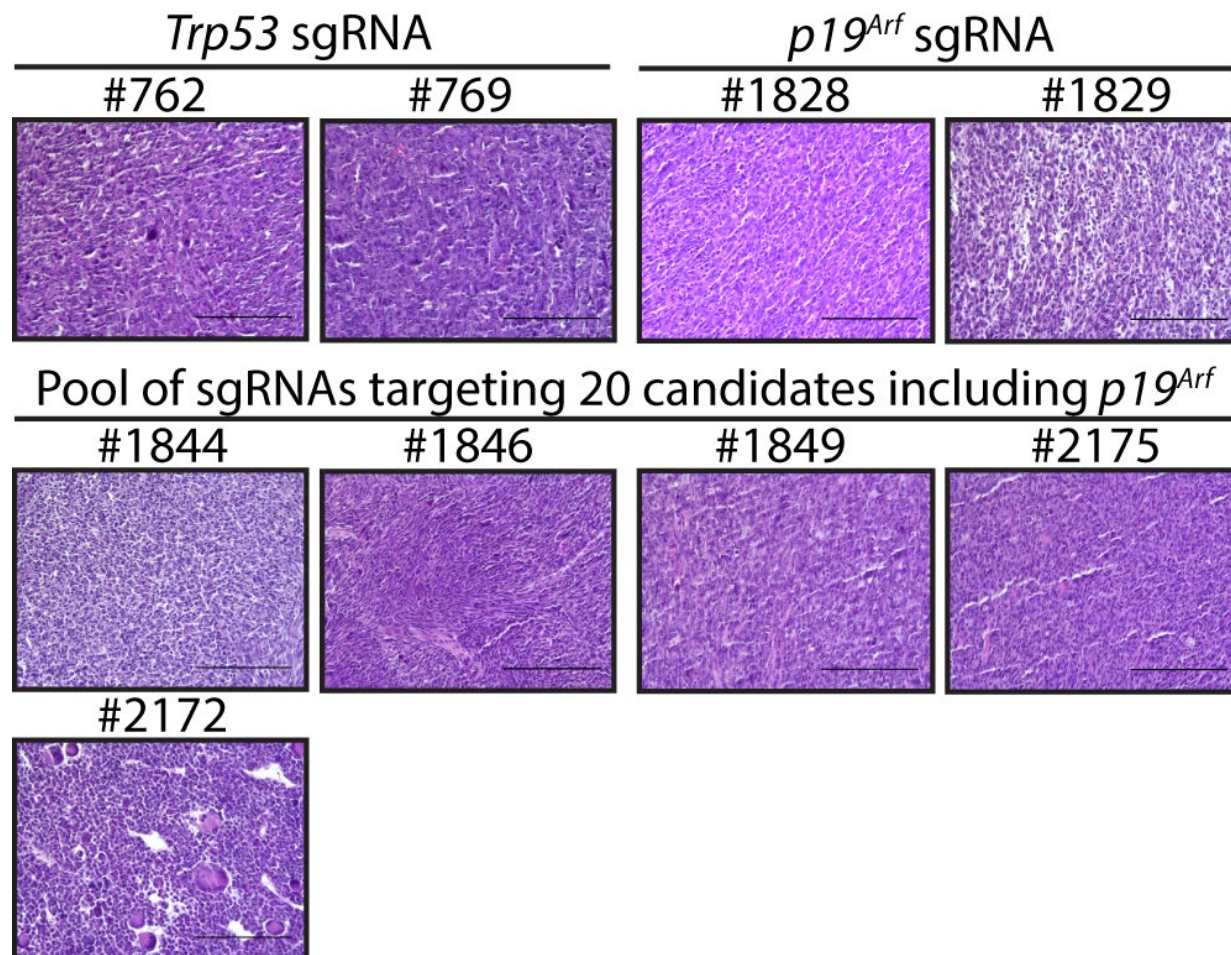

Supplementary Figure S5. All the uncropped images.

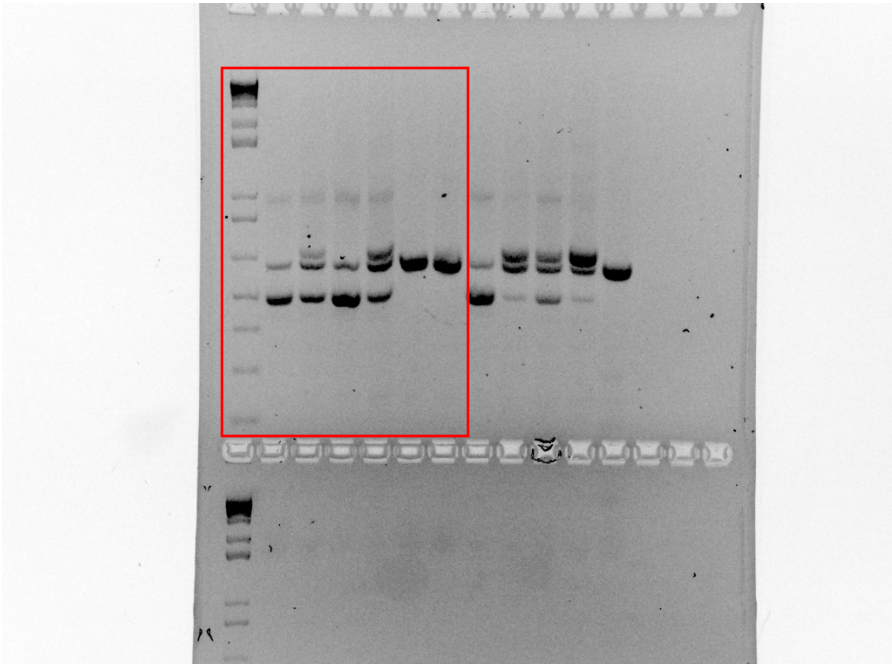

Figure 1A: Kras genotyping PCR.

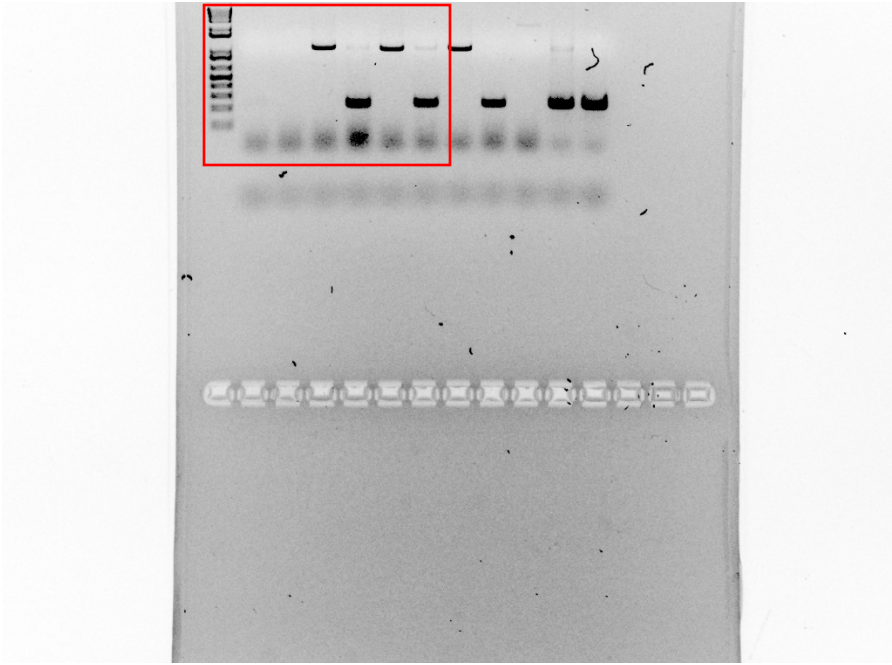

Figure 1A: Cas9 genotyping PCR.

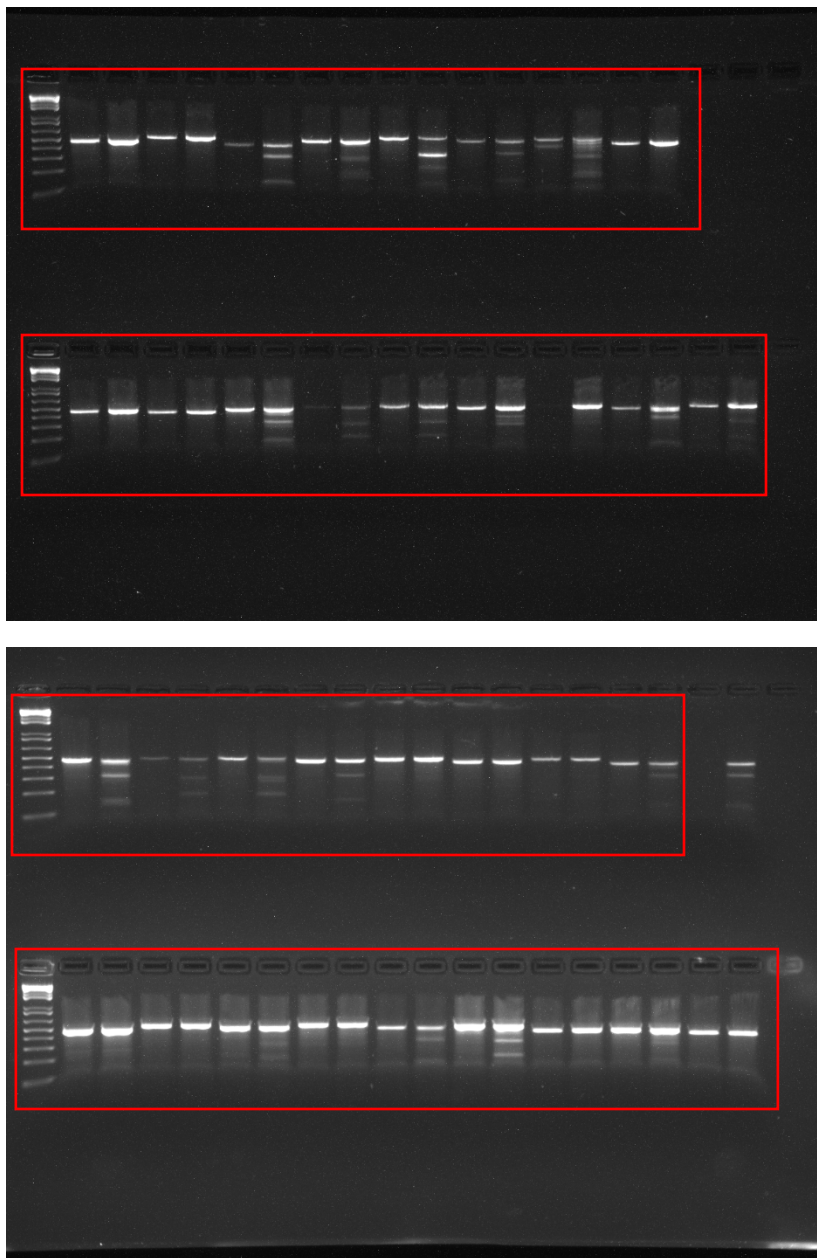

Figure S2: Surveyor assay gel images.

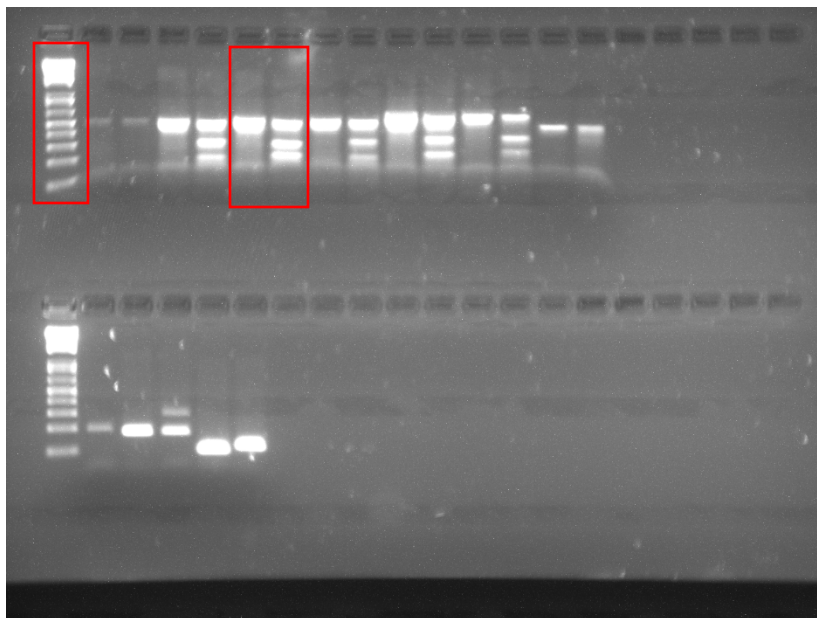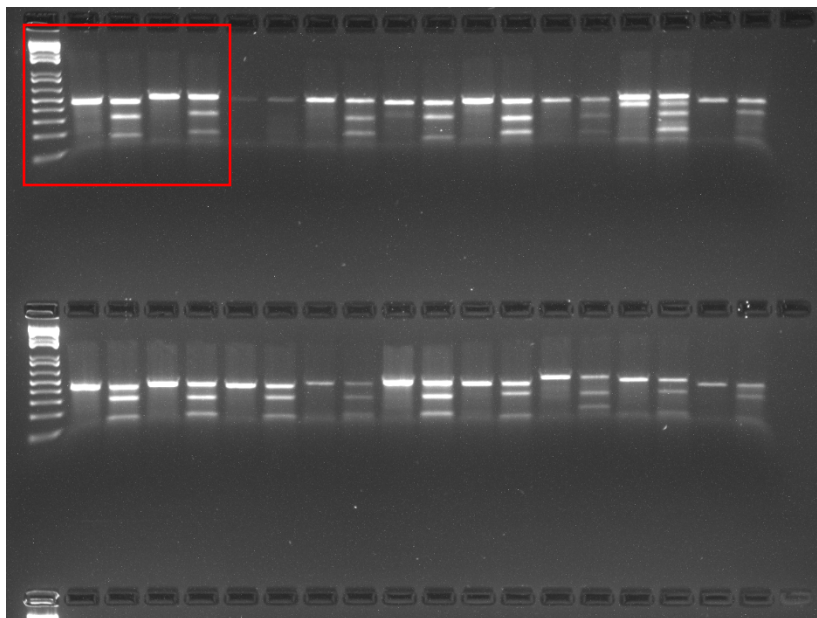

Figure S3: Surveyor assay gel images.



**Supplementary Table S1**

Correlation of *FBXW7* and *SLC9A3* with *KRAS* in all human cancer patients in the TCGA database.

| Gene A      | Gene B               | Mutation Tendency: Co-occurrence/Mutual exclusivity (N/A: Not Applicable) | p-Value | Adjusted p-Value |
|-------------|----------------------|---------------------------------------------------------------------------|---------|------------------|
| <i>KRAS</i> | <b><i>FBXW7</i></b>  | Co-occurrence                                                             | < 0.001 | < 0.001          |
| <i>KRAS</i> | <b><i>SLC9A3</i></b> | Co-occurrence                                                             | < 0.001 | < 0.001          |
| <i>KRAS</i> | <i>KANSL2</i>        | Co-occurrence                                                             | < 0.001 | < 0.001          |
| <i>KRAS</i> | <i>IZUMO2</i>        | Co-occurrence                                                             | 0.31    | 0.31             |
| <i>KRAS</i> | <i>SLMAP</i>         | Co-occurrence                                                             | < 0.001 | < 0.001          |
| <i>KRAS</i> | <i>FILIP1</i>        | Co-occurrence                                                             | < 0.001 | < 0.001          |
| <i>KRAS</i> | <i>FBXO42</i>        | Co-occurrence                                                             | < 0.001 | < 0.001          |
| <i>KRAS</i> | <i>MAN2B1</i>        | Co-occurrence                                                             | < 0.001 | < 0.001          |
| <i>KRAS</i> | <i>CDKN2B</i>        | Co-occurrence                                                             | 0.08    | 0.08             |
| <i>KRAS</i> | <i>MAT2B</i>         | Co-occurrence                                                             | < 0.001 | < 0.001          |
| <i>KRAS</i> | <i>FAM21</i>         | N/A                                                                       |         |                  |
| <i>KRAS</i> | <i>4930452B06RIK</i> | N/A                                                                       |         |                  |
| <i>KRAS</i> | <i>OBSL1</i>         | Co-occurrence                                                             | < 0.001 | < 0.001          |
| <i>KRAS</i> | <i>SEMA4D</i>        | Co-occurrence                                                             | < 0.001 | < 0.001          |
| <i>KRAS</i> | <i>CCDC18</i>        | Co-occurrence                                                             | < 0.001 | < 0.001          |
| <i>KRAS</i> | <i>NFKBIL1</i>       | Co-occurrence                                                             | < 0.001 | < 0.001          |
| <i>KRAS</i> | <i>ZBTB14</i>        | Co-occurrence                                                             | < 0.001 | < 0.001          |
| <i>KRAS</i> | <i>MUP14</i>         | N/A                                                                       |         |                  |
| <i>KRAS</i> | <i>ARTN</i>          | Co-occurrence                                                             | < 0.001 | < 0.001          |
| <i>KRAS</i> | <i>LRRC8C</i>        | Co-occurrence                                                             | < 0.001 | < 0.001          |
| <i>KRAS</i> | <i>ATM</i>           | Co-occurrence                                                             | < 0.001 | < 0.001          |

**Supplementary Table S2**

sgRNA sequences.

| <b>Target gene</b>   | <b>gRNA ID</b> | <b>Target sequence (5' to 3')</b> |
|----------------------|----------------|-----------------------------------|
| <i>Trp53</i>         | gTrp53         | GTGTAATAGCTCCTGCATGG              |
| <i>Negative</i>      | gNegtive       | GCGAGGTATTCGGCTCCGCG              |
| <i>p19Arf</i>        | gp19Arf        | GGGCCGCCCACTCCAAGAGA              |
| <i>Kansl2</i>        | gKansl2        | TTGATCACTGTCTATGCTAT              |
| <i>Izumo2</i>        | glzumo2        | GTCTGCAGTCGTGGATCAAC              |
| <i>SImap</i>         | gSImap         | ATACTCACTCTGAACGAAGT              |
| <i>Fbxw7</i>         | gFbxw7 sg-1    | GTGTTGCTGAACATGGTACA              |
| <i>Fbxw7</i>         | gFbxw7 sg-2    | GTATGTCACAGATTCTAACG              |
| <i>Filip1</i>        | gFilip1        | GTGGAGAGGGAAATCAACCG              |
| <i>Fbxo42</i>        | gFbxo42        | GTCCTTGTACACGACCAGAG              |
| <i>Man2b1</i>        | gMan2b1        | AGCTCCCAGAGGTAACACGT              |
| <i>Cdkn2b</i>        | gCdkn2b        | GTCGTGCACAGGTCTGGTAA              |
| <i>Mat2b</i>         | gMat2b         | GCTGCTTCCCAGCTGAATGT              |
| <i>Fam21</i>         | gFam21         | ATTATGCAGACGACAATGTG              |
| <i>4930452B06Rik</i> | gRik           | CTGGCAGACGGAATAACCTA              |
| <i>Obsl1</i>         | gObsl1         | TGTATGTGAGACCCGAGATG              |
| <i>Sema4d</i>        | gSema4d        | GGCTGGATTCAGGACATGAG              |
| <i>Ccdc18</i>        | gCcdc18        | AAAGGAGCACAGTTTACAAG              |
| <i>Nfkbil1</i>       | gNfkbil1       | AGTGGCAGGAGGTCATCGGG              |
| <i>Zbtb14</i>        | gZbtb14        | TTGCCGTCCTCTTGACTION              |
| <i>Mup14</i>         | gMup14         | CTTCTGCATGGACACACACT              |
| <i>Artn</i>          | gArtn          | AGGGCTAGAACAGCTAGGGT              |
| <i>Lrrc8c</i>        | gLrrc8c        | TGGTTGACAAATCTGCTGCG              |
| <i>Atm</i>           | gAtm           | TAAGTCATATAGGAAGCCGA              |
| <i>Slc9a3</i>        | gSlc9a3 sg-1   | CTTCATAGTGTAGCGCACAG              |
| <i>Slc9a3</i>        | gSlc9a3 sg-2   | CATAGTGTAGCGCACAGTGG              |

### Supplementary Table S3

Primer sequences.

| Primer ID       | Sequence (5' to 3')        | Use                 |
|-----------------|----------------------------|---------------------|
| gTrp53 5.1      | CACCGTGAATAGCTCCTGCATGG    | Cloning gTrp53      |
| gTrp53 3.1      | AAACCCATGCAGGAGCTATTACAC   |                     |
| gNegative 5.1   | CACCGGCGAGGTATTCGGCTCCGCG  | Cloning gNegative   |
| gNegative 3.1   | AAACCGCGGAGCCGAATACCTCGCC  |                     |
| gp19Arf 5.1     | CACCGGGGCCGCCACTCCAAGAGA   | Cloning gp19Arf     |
| gp19Arf 3.1     | AAACTCTCTGGAGTGGGCGGCCCC   |                     |
| gKans12 5.1     | CACCGTTGATCACTGTCTATGCTAT  | Cloning gKans12     |
| gKans12 3.1     | AAACATAGCATAGACAGTGATCAAC  |                     |
| glzumo2 5.1     | CACCGgtctgcagTCGTGGATCAAC  | Cloning glzumo2     |
| glzumo2 3.1     | AAACGTTGATCCACGActgcagacC  |                     |
| gSImap 5.1      | CACCGATACTCACTCTGAACGAAGT  | Cloning gSImap      |
| gSImap 3.1      | AAACACTTCGTTCAGAGTGAGTATC  |                     |
| gFbxw7 sg-1 5.1 | CACCGGTGTTGCTGAACATGGTACA  | Cloning gFbxw7 sg-1 |
| gFbxw7 sg-1 3.1 | AAACTGTACCATGTTTCAGCAACACC |                     |
| gFbxw7 sg-1 5.1 | CACCGGTATGTCACAGATTCTAACG  | Cloning gFbxw7 sg-2 |
| gFbxw7 sg-2 3.1 | AAACCGTTAGAATCTGTGACATACC  |                     |
| gFilip1 5.1     | CACCGGTGGAGAGGGAAATCAACCG  | Cloning gFilip1     |
| gFilip1 3.1     | AAACCGGTTGATTTCCCTCTCCACC  |                     |
| gFbxo42 5.1     | CACCGGTCCTTGACACGACCAGAG   | Cloning gFbxo42     |
| gFbxo42 3.1     | AAACCTCTGGTCGTGTACAAGGACC  |                     |
| Man2b1 5.1      | CACCGAGCTCCCAGAGGTAACACGT  | Cloning gMan2b1     |
| Man2b1 3.1      | AAACACGTGTACCTCTGGGAGCTC   |                     |
| gCdkn2b 5.1     | CACCGGTCGTGCACAGGTCTGGTAA  | Cloning gCdkn2b     |
| gCdkn2b 3.1     | AAACTTACCAGACCTGTGCACGACC  |                     |
| gMat2b 5.1      | CACCGGCTGCTTCCCAGCTGAATGT  | Cloning gMat2b      |
| gMat2b 3.1      | AAACACATTGAGCTGGGAAGCAGCC  |                     |
| gFam21 5.1      | CACCGATTATGCAGACGACAATGTG  | Cloning gFam21      |
| gFam21 3.1      | AAACCACATTGTCGTCTGCATAATC  |                     |
| gRik 5.1        | CACCGCTGGCAGACGGAATAACCTA  | Cloning gRik        |
| gRik 3.1        | AAACTAGGTTATTCCGTCTGCCAGC  |                     |
| gObsl1 5.1      | CACCGTGTATGTGAGACCCGAGATG  | Cloning gObsl1      |
| gObsl1 3.1      | AAACCATCTCGGTTCTCACATACAC  |                     |
| gSema4d 5.1     | CACCGGGCTGGATTGAGGACATGAG  | Cloning gSema4d     |
| gSema4d 3.1     | AAACCTCATGTCTGAATCCAGCCC   |                     |
| gCcdc18 5.1     | CACCGAAAGGAGCACAGTTTACAAG  | Cloning gCcdc18     |
| gCcdc18 3.1     | AAACCTTGAAACTGTGCTCCTTTC   |                     |
| gNfkbil1 5.1    | CACCGAGTGGCAGGAGGTCATCGGG  | Cloning gNfkbil1    |

|                  |                                  |                                   |
|------------------|----------------------------------|-----------------------------------|
| gNfkbil1 3.1     | AAACCCCGATGACCTCCTGCCACTC        |                                   |
| gZbtb14 5.1      | CACCGTTGCCGTCTCTTGACTCGG         | Cloning gZbtb14                   |
| gZbtb14 3.1      | AAACCCGAGTCAAGAGGACGGCAAC        |                                   |
| gMup14 5.1       | CACCGCTTCTGCATGGACACACT          | Cloning gMup14                    |
| gMup14 3.1       | AAACAGTGTGTGCCATGCAGAAGC         |                                   |
| gArtn 5.1        | CACCGAGGGCTAGAACAGCTAGGGT        | Cloning gArtn                     |
| gArtn 3.1        | AAACACCCTAGCTGTTCTAGCCCTC        |                                   |
| gLrrc8c 5.1      | CACCGTGGTTGACAAATCTGCTGCG        | Cloning gLrrc8c                   |
| gLrrc8c 3.1      | AAACCGCAGCAGATTTGTCAACCAC        |                                   |
| gAtm 5.1         | CACCGTAAGTCATATAGGAAGCCGA        | Cloning gAtm                      |
| gAtm 3.1         | AAACTCGGCTTCTATATGACTTAC         |                                   |
| gSlc9a3 sg-1 5.1 | CACCGCTTCATAGTGTAGCGCACAG        | Cloning gSlc9a3 sg-1              |
| gSlc9a3 sg-1 3.1 | AAACCTGTGCGCTACACTATGAAGC        |                                   |
| gSlc9a3 sg-2 5.1 | CACCGCATAGTGTAGCGCACAGTGG        | Cloning gSlc9a3 sg-2              |
| gSlc9a3 sg-2 3.1 | AAACCCACTGTGCGCTACACTATGC        |                                   |
| gTrp53 svg 5.1   | TGCCGAACAGGTGGAATATC             | Amplify Trp53 locus for Surveyor  |
| gTrp53 svg 3.1   | CATCCTGACTGTGTGAACTAGGCCCC       |                                   |
| gp19Arf svg 5.1  | <b>CACCGGGGCCGCCCACTCCAAGAGA</b> | Amplify Cdkn2a locus for Surveyor |
| gp19Arf svg 3.1  | <b>AAACTCTCTTGAGTGGGCGGCCCC</b>  |                                   |
| gKansl2 svg 5.1  | CGGATACTGGGTAAGGATCC             | Amplify Kansl2 locus for Surveyor |
| gKansl2 svg 3.1  | TAAGGGCAAGACTCAGTTCC             |                                   |
| glzumo2 svg 5.1  | GTGAGGTCACAAAGTCCCCA             | Amplify Izumo2 locus for Surveyor |
| glzumo2 svg 3.1  | TTCTCCCTCTCAACCCCTTC             |                                   |
| gSlmap svg 5.1   | AGGCAGTAGACTAGGTGTGA             | Amplify Slmap locus for Surveyor  |
| gSlmap svg 3.1   | CCTACATTAACACCACAGGC             |                                   |
| gFbxw7 svg 5.1   | CCCTGAGAGTAGCAAGCGAA             | Amplify Fbxw7 locus for Surveyor  |
| gFbxw7 svg 3.1   | TCTTCTGTACTCCCACCCTG             |                                   |
| gFilip1 svg 5.1  | ACTGTGATGCTGGTGGACGA             | Amplify Filip1 locus for Surveyor |
| gFilip1 svg 3.1  | TTGCCTTATCCTGCTCGGTT             |                                   |
| gFbxo42 svg 5.1  | GGCCATTGTGGCACTGTTGT             | Amplify Fbxo42 locus for Surveyor |
| gFbxo42 svg 3.1  | CCAGACACAGACTGGGTTCT             |                                   |
| Man2b1 svg 5.1   | ACCTATTGGATTCTGTGGG              | Amplify Man2b1 locus for Surveyor |
| Man2b1 svg 3.1   | ACCAGTGCTTCCAGCTGGTT             |                                   |
| gCdkn2b svg 5.1  | TAAGCCATTTCTCCGCCCTT             | Amplify Cdkn2b locus for Surveyor |
| gCdkn2b svg 3.1  | AACCCGCAGTCAATCTCCAG             |                                   |
| gMat2b svg 5.1   | CCCAGTTCTTTAGACAGAGG             | Amplify Mat2b locus for Surveyor  |
| gMat2b svg 3.1   | CTCCAAGGACCCACATGAAT             |                                   |
| gFam21 svg 5.1   | CAGGGCTTTAAATCCCTGTA             | Amplify Fam21 locus for Surveyor  |
| gFam21 svg 3.1   | CAAGAACCAATCTATCCACC             |                                   |
| gRik svg 5.1     | GCTCCTCCCTGCTTCTAAA              |                                   |

|                  |                      |                                                |
|------------------|----------------------|------------------------------------------------|
| gRik svg 3.1     | TCAGGCACATAGTCAGCTTC | Amplify<br>4930452B06Rik<br>locus for Surveyor |
| gObsl1 svg 5.1   | TGTATTGGAGAGGCAGGGAG | Amplify Obsl1<br>locus for Surveyor            |
| gObsl1 svg 3.1   | CACCGGAAGCTCTGCACAAA |                                                |
| gSema4d svg 5.1  | CCTGAGTCCTCCTTACACTT | Amplify Sema4d<br>locus for Surveyor           |
| gSema4d svg 3.1  | GCGTGACACTTGACTTCTGT |                                                |
| gCcdc18 svg 5.1  | GCTGTGAATATACCTGTGCC | Amplify Ccdc18<br>locus for Surveyor           |
| gCcdc18 svg 3.1  | TGAGCAATACAGTTCAGTGG |                                                |
| gNfkbil1 svg 5.1 | GAGCGTTCAAACTCCACAC  | Amplify Nfkbil1<br>locus for Surveyor          |
| gNfkbil1 svg 3.1 | AGGTTGTCGGAGAGAGGCTA |                                                |
| gZbtb14 svg 5.1  | AGCTAGAAGTAGACAGCTCG | Amplify Zbtb14<br>locus for Surveyor           |
| gZbtb14 svg 3.1  | ACTCCACTTCCTGGCCGTAA |                                                |
| gArtn svg 5.1    | GTGAGTCGCTGGCTTTCCTT | Amplify Artn locus<br>for Surveyor             |
| gArtn svg 3.1    | TCACITTCGGAGGTGTGGGT |                                                |
| gLrrc8c svg 5.1  | CCACTGGTATGCCAAGTACT | Amplify Lrrc8c<br>locus for Surveyor           |
| gLrrc8c svg 3.1  | ACTTTGGAAACCAGGGCACT |                                                |
| gAtm svg 5.1     | TCCCATGTGGAAGAAGGGCA | Amplify Atm locus<br>for Surveyor              |
| gAtm svg 3.1     | CAAGCATCCAGCAGAGAGAA |                                                |
| gSlc9a3 svg 5.1  | CTAGTCTTGGAGCATGGAAG | Amplify Slc9a3<br>locus for Surveyor           |
| gSlc9a3 svg 3.1  | GGGAGCCTAGCTACTACTAA |                                                |

## Supplementary Table S4

Top 10 genes co-mutated with *Kras* each type of cancer.

|                                | Gene          | Cytoband        | Altered group        | Unaltered group        | Log Ratio        | p-Value        | q-Value        | Tendency        |
|--------------------------------|---------------|-----------------|----------------------|------------------------|------------------|----------------|----------------|-----------------|
| Colon Cancer                   | <i>PIK3CA</i> | 3q26.32         | 752 (24.55%)         | 531 (13.60%)           | 0.85             | 1.45E-31       | 4.87E-29       | Co-occurrence   |
|                                | <i>APC</i>    | 5q22.2          | 2119 (69.18%)        | 2230 (57.14%)          | 0.28             | 2.79E-25       | 7.02E-23       | Co-occurrence   |
|                                | <i>SMAD4</i>  | 18q21.2         | 508 (16.59%)         | 448 (11.48%)           | 0.53             | 5.63E-10       | 9.43E-08       | Co-occurrence   |
|                                | <i>SMAD2</i>  | 18q21.1         | 110 (3.59%)          | 59 (1.51%)             | 1.25             | 1.80E-08       | 2.58E-06       | Co-occurrence   |
|                                | <i>FBXW7</i>  | 4q31.3          | 394 (12.86%)         | 342 (8.76%)            | 0.55             | 2.31E-08       | 2.90E-06       | Co-occurrence   |
|                                | <i>AMER1</i>  | Xq11.2          | 127 (4.15%)          | 77 (1.97%)             | 1.07             | 7.58E-08       | 8.46E-06       | Co-occurrence   |
|                                | <i>CTNNB1</i> | 3p22.1          | 171 (5.58%)          | 166 (4.25%)            | 0.39             | 6.16E-03       | 0.238          | Co-occurrence   |
|                                | <i>TGFBR1</i> | 9q22.33         | 29 (0.95%)           | 17 (0.44%)             | 1.12             | 6.98E-03       | 0.246          | Co-occurrence   |
|                                | <i>SOX9</i>   | 17q24.3         | 243 (7.93%)          | 253 (6.48%)            | 0.29             | 0.0111         | 0.3            | Co-occurrence   |
|                                | <i>TCF7L2</i> | 10q25.2-q       | 198 (6.46%)          | 201 (5.15%)            | 0.33             | 0.0111         | 0.3            | Co-occurrence   |
| Non Small Cell Lung Cancer     | <b>Gene</b>   | <b>Cytoband</b> | <b>Altered group</b> | <b>Unaltered group</b> | <b>Log Ratio</b> | <b>p-Value</b> | <b>q-Value</b> | <b>Tendency</b> |
|                                | <i>STK11</i>  | 19p13.3         | 605 (19.25%)         | 595 (7.59%)            | 1.34             | 2.68E-64       | 1.78E-61       | Co-occurrence   |
|                                | <i>ATM</i>    | 11q22.3         | 359 (11.42%)         | 394 (5.03%)            | 1.18             | 1.42E-30       | 4.71E-28       | Co-occurrence   |
|                                | <i>RBM10</i>  | Xp11.3          | 236 (7.51%)          | 290 (3.70%)            | 1.02             | 3.52E-16       | 9.35E-14       | Co-occurrence   |
|                                | <i>MAX</i>    | 14q23.3         | 49 (1.56%)           | 24 (0.31%)             | 2.35             | 9.04E-12       | 1.33E-09       | Co-occurrence   |
|                                | <i>KEAP1</i>  | 19p13.2         | 371 (11.80%)         | 603 (7.70%)            | 0.62             | 1.53E-11       | 2.04E-09       | Co-occurrence   |
|                                | <i>NKX2-1</i> | 14q13.3         | 81 (2.58%)           | 73 (0.93%)             | 1.47             | 2.75E-10       | 3.32E-08       | Co-occurrence   |
|                                | <i>U2AF1</i>  | 21q22.3         | 72 (2.29%)           | 70 (0.89%)             | 1.36             | 2.05E-08       | 1.91E-06       | Co-occurrence   |
|                                | <i>IDH1</i>   | 2q34            | 63 (2.00%)           | 63 (0.80%)             | 1.32             | 2.97E-07       | 2.32E-05       | Co-occurrence   |
|                                | <i>AMER1</i>  | Xq11.2          | 76 (2.42%)           | 87 (1.11%)             | 1.12             | 7.02E-07       | 4.66E-05       | Co-occurrence   |
| <i>NTRK3</i>                   | 15q25.3       | 167 (5.31%)     | 268 (3.42%)          | 0.64                   | 4.77E-06         | 3.02E-04       | Co-occurrence  |                 |
| Pancreatic Cancer              | <b>Gene</b>   | <b>Cytoband</b> | <b>Altered group</b> | <b>Unaltered group</b> | <b>Log Ratio</b> | <b>p-Value</b> | <b>q-Value</b> | <b>Tendency</b> |
|                                | <i>TP53</i>   | 17p13.1         | 1398 (73.93%)        | 127 (18.76%)           | 1.98             | 4.17E-142      | 3.77E-139      | Co-occurrence   |
|                                | <i>CDKN2A</i> | 9p21.3          | 415 (21.95%)         | 25 (3.69%)             | 2.57             | 6.81E-34       | 2.05E-31       | Co-occurrence   |
|                                | <i>SMAD4</i>  | 18q21.2         | 415 (21.95%)         | 56 (8.27%)             | 1.41             | 3.58E-17       | 5.40E-15       | Co-occurrence   |
|                                | <i>KDM6A</i>  | Xp11.3          | 80 (4.23%)           | 9 (1.33%)              | 1.67             | 1.04E-04       | 7.24E-03       | Co-occurrence   |
|                                | <i>RNF43</i>  | 17q22           | 99 (5.24%)           | 14 (2.07%)             | 1.34             | 1.83E-04       | 0.0118         | Co-occurrence   |
|                                | <i>RBM10</i>  | Xp11.3          | 35 (1.85%)           | 2 (0.30%)              | 2.65             | 1.13E-03       | 0.0513         | Co-occurrence   |
|                                | <i>TGFBR2</i> | 3p24.1          | 48 (2.54%)           | 5 (0.74%)              | 1.78             | 1.91E-03       | 0.0695         | Co-occurrence   |
|                                | <i>U2AF1</i>  | 21q22.3         | 24 (1.27%)           | 1 (0.15%)              | 3.1              | 4.59E-03       | 0.143          | Co-occurrence   |
|                                | <i>AKT3</i>   | 1q43-q44        | 16 (0.85%)           | 0 (0.00%)              | >10              | 7.35E-03       | 0.195          | Co-occurrence   |
| <i>SMAD3</i>                   | 15q22.33      | 32 (1.69%)      | 3 (0.44%)            | 1.93                   | 8.37E-03         | 0.21           | Co-occurrence  |                 |
| Soft Tissue Sarcoma            | <b>Gene</b>   | <b>Cytoband</b> | <b>Altered group</b> | <b>Unaltered group</b> | <b>Log Ratio</b> | <b>p-Value</b> | <b>q-Value</b> | <b>Tendency</b> |
|                                | <i>PIK3CA</i> | 3q26.32         | 7 (21.21%)           | 69 (3.29%)             | 2.69             | 1.12E-04       | 0.111          | Co-occurrence   |
|                                | <i>KDM5A</i>  | 12p13.33        | 4 (12.12%)           | 19 (0.91%)             | 3.74             | 3.43E-04       | 0.17           | Co-occurrence   |
|                                | <i>SMO</i>    | 7q32.1          | 3 (9.09%)            | 13 (0.62%)             | 3.88             | 1.65E-03       | 0.391          | Co-occurrence   |
|                                | <i>POLE</i>   | 12q24.33        | 4 (12.12%)           | 32 (1.52%)             | 2.99             | 1.98E-03       | 0.391          | Co-occurrence   |
|                                | <i>PARP1</i>  | 1q42.12         | 2 (6.06%)            | 3 (0.14%)              | 5.41             | 2.26E-03       | 0.391          | Co-occurrence   |
|                                | <i>CSF1R</i>  | 5q32            | 3 (9.09%)            | 16 (0.76%)             | 3.58             | 2.77E-03       | 0.391          | Co-occurrence   |
|                                | <i>NTRK2</i>  | 9q21.33         | 3 (9.09%)            | 16 (0.76%)             | 3.58             | 2.77E-03       | 0.391          | Co-occurrence   |
|                                | <i>CHEK1</i>  | 11q24.2         | 2 (6.06%)            | 4 (0.19%)              | 4.99             | 3.35E-03       | 0.415          | Co-occurrence   |
|                                | <i>NOTCH2</i> | 1p12            | 4 (12.12%)           | 42 (2.00%)             | 2.6              | 4.91E-03       | 0.54           | Co-occurrence   |
| <i>PIK3CD</i>                  | 1p36.22       | 2 (6.06%)       | 6 (0.29%)            | 4.41                   | 6.14E-03         | 0.608          | Co-occurrence  |                 |
| All four cancer types combined | <b>Gene</b>   | <b>Cytoband</b> | <b>Altered group</b> | <b>Unaltered group</b> | <b>Log Ratio</b> | <b>p-Value</b> | <b>q-Value</b> | <b>Tendency</b> |
|                                | <i>SMAD4</i>  | 18q21.2         | 1018 (12.52%)        | 771 (5.31%)            | 1.24             | 2.42E-79       | 1.52E-76       | Co-occurrence   |
|                                | <i>APC</i>    | 5q22.2          | 2313 (28.45%)        | 2687 (18.51%)          | 0.62             | 1.01E-65       | 4.76E-63       | Co-occurrence   |
|                                | <i>STK11</i>  | 19p13.3         | 679 (8.35%)          | 662 (4.56%)            | 0.87             | 4.27E-30       | 1.34E-27       | Co-occurrence   |
|                                | <i>CDKN2A</i> | 9p21.3          | 655 (8.06%)          | 638 (4.40%)            | 0.87             | 4.17E-29       | 1.12E-26       | Co-occurrence   |
|                                | <i>PIK3CA</i> | 3q26.32         | 992 (12.20%)         | 1152 (7.94%)           | 0.62             | 2.35E-25       | 5.53E-23       | Co-occurrence   |
|                                | <i>ATM</i>    | 11q22.3         | 671 (8.25%)          | 758 (5.22%)            | 0.66             | 5.36E-19       | 1.01E-16       | Co-occurrence   |
|                                | <i>AMER1</i>  | Xq11.2          | 216 (2.66%)          | 179 (1.23%)            | 1.11             | 1.32E-14       | 2.07E-12       | Co-occurrence   |
|                                | <i>FBXW7</i>  | 4q31.3          | 467 (5.74%)          | 527 (3.63%)            | 0.66             | 1.52E-13       | 2.04E-11       | Co-occurrence   |
|                                | <i>SMAD3</i>  | 15q22.33        | 103 (1.27%)          | 76 (0.52%)             | 1.27             | 2.72E-09       | 2.70E-07       | Co-occurrence   |
| <i>TGFBR1</i>                  | 9q22.33       | 83 (1.02%)      | 57 (0.39%)           | 1.38                   | 1.41E-08         | 1.26E-06       | Co-occurrence  |                 |
